# Supplementary material for: Impacts of beaver dams on hydrologic and temperature regimes in a mountain stream
Source: Copernicus journal article supplement (doi:10.5194/hess-19-3541-2015), 2015-08-11
Supplement: Supplementary file 2 [file hess-19-3541-2015-supplement.zip]

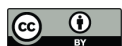

*Supplement of*

## **Impacts of beaver dams on hydrologic and temperature regimes in a mountain stream**

**M. Majerova et al.**

*Correspondence to:*

- [hess-19-3541-2015-supplement-title-page.pdf](#)
- [MajerovaEtAL\\_SupplementaryFigures.pdf](#)
  - [Captions-SupplementaryFigures.pdf](#)
  - [SI\\_Figure1.pdf](#)
  - [SI\\_Figure2.pdf](#)
  - [SI\\_Figure3.pdf](#)
  - [SI\\_Figure4.pdf](#)
  - [SI\\_Figure5.pdf](#)

The copyright of individual parts of the supplement might differ from the CC-BY 3.0 licence.
