# Supplementary figures and images for: Impacts of beaver dams on hydrologic and temperature regimes in a mountain stream
Source: Copernicus journal article supplement (doi:10.5194/hess-19-3541-2015), 2015-08-11

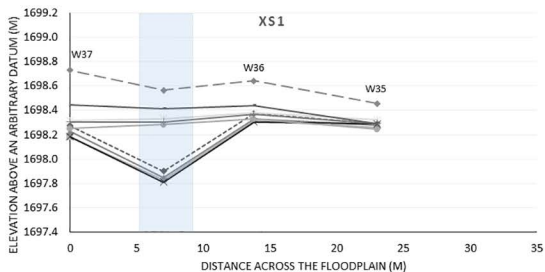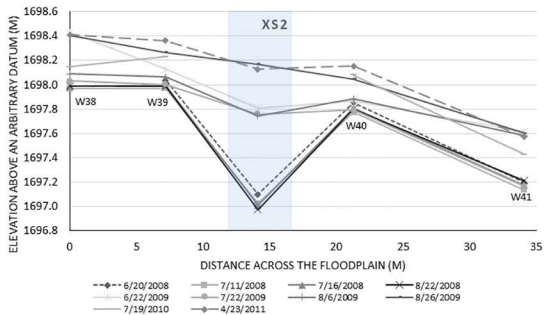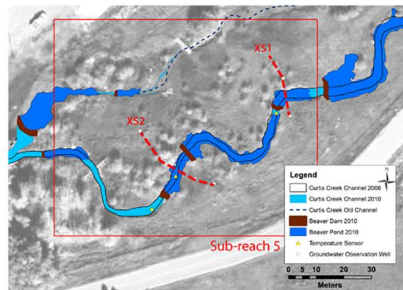

Supplement: Supplementary file 1 [file hess-19-3541-2015-supplement.zip]

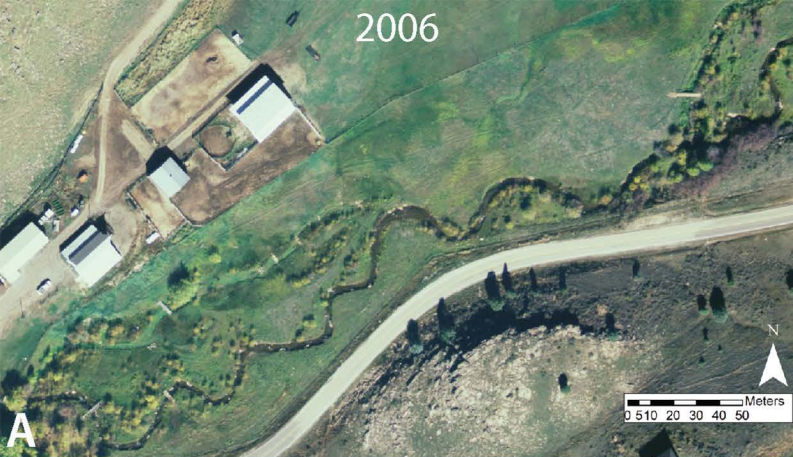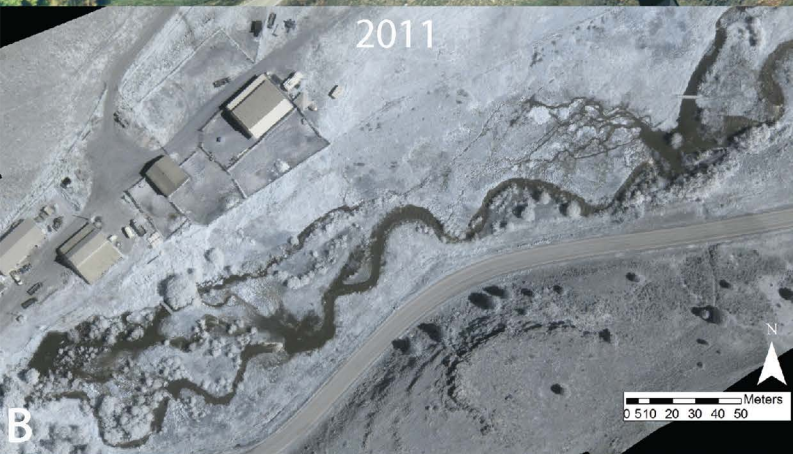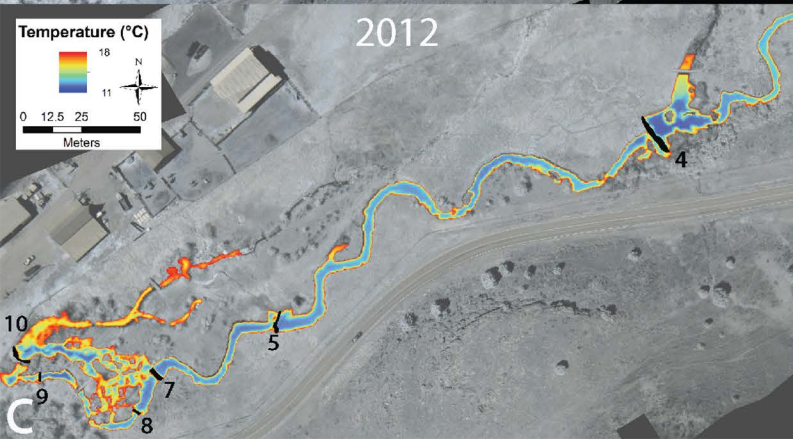

Supplement: Supplementary file 3 [file hess-19-3541-2015-supplement.zip]

# Bug Lake (374) Utah SNOTEL Site - 7950 ft

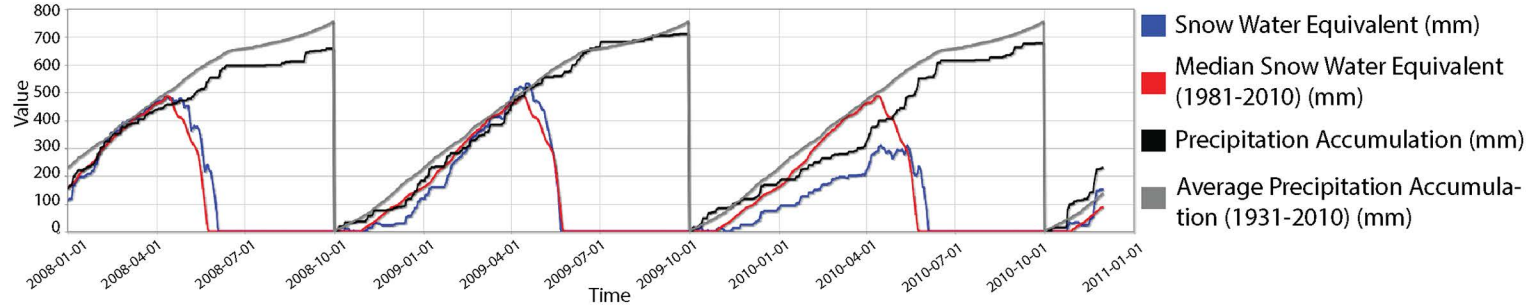

Supplement: Supplementary file 5 [file hess-19-3541-2015-supplement.zip]

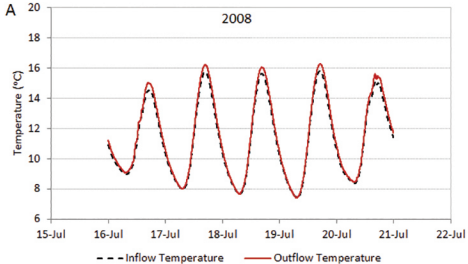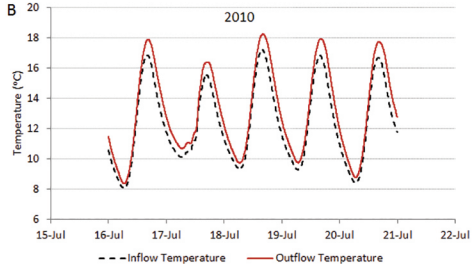

Supplement: Supplementary file 6 [file hess-19-3541-2015-supplement.zip]

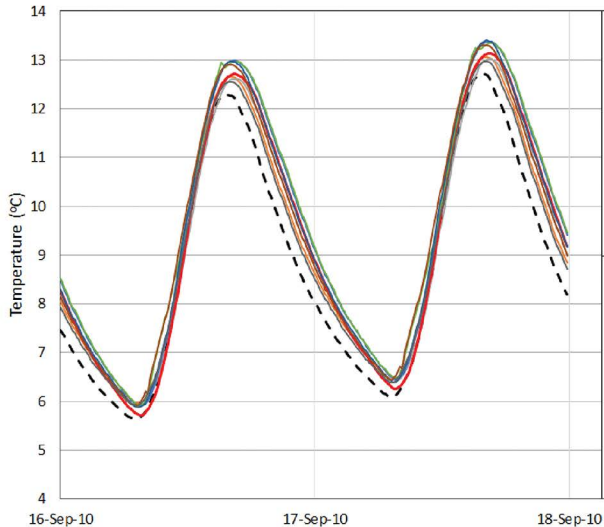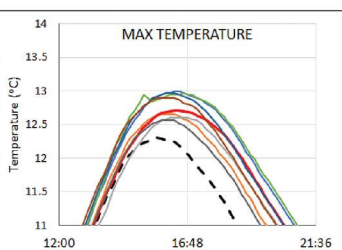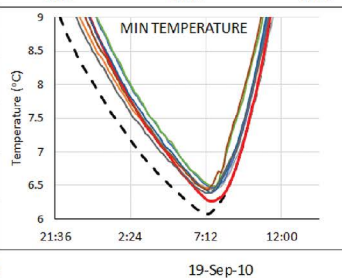

- PT515
- PT1252
- Above BD7/Below BD5
- Above BD4/Below BD3
- Below BD8
- Above BD5
- Below BD4
- Above BD8/Below BD7
- Above BD3

Supplement: Supplementary file 7 [file hess-19-3541-2015-supplement.zip]
